# Supplementary material for: PTree: pattern-based, stochastic search for maximum parsimony phylogenies
Source: PeerJ journal article supplement (doi:10.7717/peerj.89), 2013-06-25
Supplement: SupplementalTableS9.pdf [file SupplementalTableS9.pdf]

|        |             | Size of input dataset |         |         |         |         |         |         |
|--------|-------------|-----------------------|---------|---------|---------|---------|---------|---------|
|        |             | 125                   | 250     | 500     | 1,000   | 2,000   | 4,000   | 8,000   |
| Method | NJ          | 103.178               | 101.875 | 101.680 | 101.948 | 101.649 | 101.731 | 100.926 |
|        | PAUP* (NNI) | 100.459               | 99.870  | 100.046 | 100.152 | 100.185 | 100.244 | 100.249 |
|        | PTree       | 100                   | 100     | 100     | 100     | 100     | 100     | 100     |
|        | TNT (SPR)   | 99.574                | 99.265  | 99.313  | 99.223  | 99.080  | 99.051  | 98.991  |
|        | PAUP* (SPR) | 99.656                | 99.222  | 99.332  | 99.281  | 99.129  | 99.155  | –       |
|        | PAUP* (TBR) | 99.607                | 99.170  | 99.220  | 99.187  | 99.056  | 99.100  | –       |
