# Supplementary material for: PTree: pattern-based, stochastic search for maximum parsimony phylogenies
Source: PeerJ journal article supplement (doi:10.7717/peerj.89), 2013-06-25
Supplement: SupplementalTableS10.pdf [file SupplementalTableS10.pdf]

|               |             | Size of input dataset |         |         |          |          |          |         |
|---------------|-------------|-----------------------|---------|---------|----------|----------|----------|---------|
|               |             | 125                   | 250     | 500     | 1,000    | 2,000    | 4,000    | 8,000   |
| <b>Method</b> | NJ          | 1.031                 | 0.342   | 0.238   | 0.234    | 0.234    | 0.203    | 0.645   |
|               | PAUP* (NNI) | 12.371                | 20.171  | 54.286  | 166.940  | 165.625  | 239.024  | 390.196 |
|               | PTree       | 100                   | 100     | 100     | 100      | 100      | 100      | 100     |
|               | TNT (SPR)   | 20.619                | 23.932  | 40.0    | 46.659   | 64.115   | 137.282  | 141.317 |
|               | PAUP* (SPR) | 142.784               | 153.846 | 559.524 | 1,153.58 | 2,062.50 | 3,246.34 | –       |
|               | PAUP* (TBR) | 142.784               | 466.667 | 820.476 | 2,124.27 | 3,357.81 | 3,982.93 | –       |
