# Supplementary material for: PTree: pattern-based, stochastic search for maximum parsimony phylogenies
Source: PeerJ journal article supplement (doi:10.7717/peerj.89), 2013-06-25
Supplement: SupplementalTableS11.pdf [file SupplementalTableS11.pdf]

|        |             | Size of input dataset |         |         |         |         |         |         |
|--------|-------------|-----------------------|---------|---------|---------|---------|---------|---------|
|        |             | 125                   | 250     | 500     | 1,000   | 2,000   | 4,000   | 8,000   |
| Method | NJ          | 102.463               | 102.608 | 102.492 | 103.293 | 103.565 | 102.329 | 102.193 |
|        | PAUP* (NNI) | 101.285               | 101.649 | 101.221 | 101.545 | 101.131 | 100.205 | 100.199 |
|        | PTree       | 100                   | 100     | 100     | 100     | 100     | 100     | 100     |
|        | TNT (SPR)   | 100                   | 99.425  | 99.186  | 99.309  | 99.007  | 99.001  | 98.978  |
|        | PAUP* (SPR) | 100                   | 99.616  | 99.220  | 99.219  | 98.888  | 98.948  | –       |
|        | PAUP* (TBR) | 99.893                | 99.310  | 98.949  | 98.862  | 98.673  | 98.766  | –       |
