# Supplementary material for: PTree: pattern-based, stochastic search for maximum parsimony phylogenies
Source: PeerJ journal article supplement (doi:10.7717/peerj.89), 2013-06-25
Supplement: SupplementalTableS17.pdf [file SupplementalTableS17.pdf]

|        |             | Size of input dataset |         |         |         |         |         |         |
|--------|-------------|-----------------------|---------|---------|---------|---------|---------|---------|
|        |             | 125                   | 250     | 500     | 1,000   | 2,000   | 4,000   | 8,000   |
| Method | NJ          | 102.572               | 102.766 | 102.719 | 103.647 | 103.679 | 102.393 | 102.232 |
|        | PAUP* (NNI) | 100.429               | 101.114 | 100.612 | 101.558 | 100.889 | 100.162 | 100.069 |
|        | PTree       | 100                   | 100     | 100     | 100     | 100     | 100     | 100     |
|        | TNT (SPR)   | 100.107               | 99.577  | 99.405  | 99.649  | 99.116  | 99.063  | 99.016  |
|        | PAUP* (SPR) | 99.893                | 99.616  | 99.150  | 99.364  | 98.939  | 99.010  | –       |
|        | PAUP* (TBR) | 99.893                | 99.347  | 98.912  | 99.062  | 98.686  | 98.828  | –       |
